# Supplementary material for: Mechanistic insights into photochromic 3H-naphthopyran showing strong photocoloration
Source: PubMed Central journal article supplement (PMC9232484; doi:10.1038/s41598-022-14679-9), 2022-06-24
Supplement: 41598_2022_14679_MOESM1_ESM.pdf [file 41598_2022_14679_MOESM1_ESM.pdf]

**Supplementary data for**  
**Mechanistic insights into photochromic 3*H*-naphthopyran**  
**showing strong photocoloration**

Błażej Gierczyk<sup>a</sup>, Michał F. Rode<sup>b,\*</sup> and Gotard Burdzinski<sup>c,\*</sup>

<sup>a</sup> Faculty of Chemistry, Adam Mickiewicz University in Poznań, Uniwersytetu Poznańskiego 8, 61-614 Poznań, Poland,

<sup>b</sup> Institute of Physics, Polish Academy of Sciences, Aleja Lotników 32/46, 02-668 Warsaw, Poland, E-Mail: [mrode@ifpan.edu.pl](mailto:mrode@ifpan.edu.pl) (M.R.),

<sup>c</sup> Faculty of Physics, Adam Mickiewicz University in Poznań, Uniwersytetu Poznańskiego 2, 61-614 Poznań, Poland, E-Mail: [gotardb@amu.edu.pl](mailto:gotardb@amu.edu.pl) (G.B.)

---

## Synthesis of compound 2

### (3-(2-Methoxyphenyl)-3-phenyl-3H-benzo[f]chromene

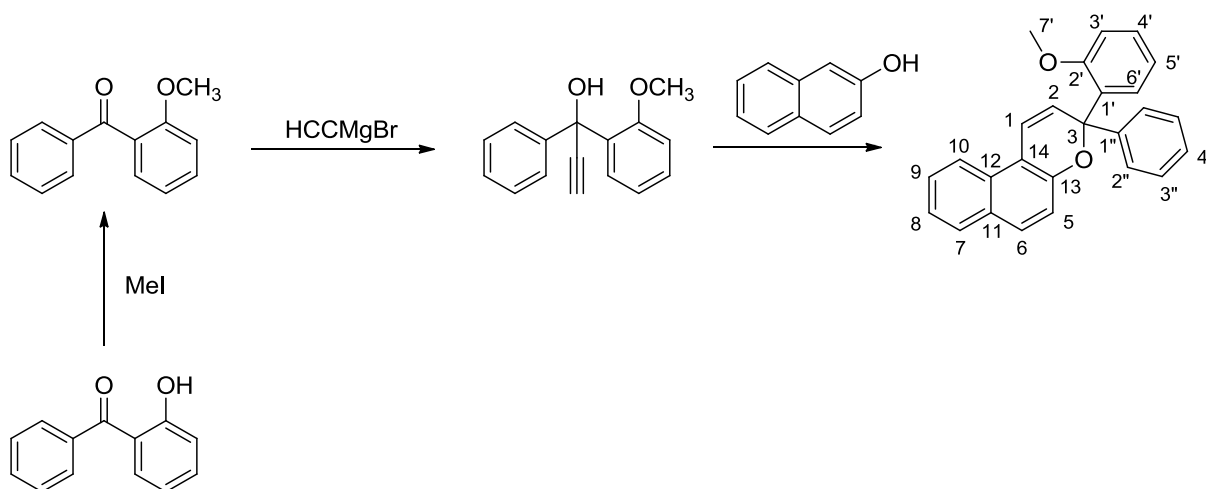

#### 2-Methoxybenzophenone

To the solution of 2-hydroxybenzophenone (2.00 g, 10.1 mmol) in dry acetone (50 mL), anhydrous potassium phosphate (5.00 g, 23.6 mmol) and iodomethane (1.3 mL, 20.9 mmol) were added. The mixture obtained was stirred and refluxed over 5 h. After cooling, the solids were filtered off, and the solvent was evaporated. Product was purified by column chromatography on silica, using chloroform/hexane 1:1 (v/v) as eluent; yield 2.02 g (94%) as a colorless oil.

$^1\text{H NMR}$  ( $\text{CDCl}_3$ ):  $\delta$  7.81 (2H, *pseudod*), 7.54 (1H, *pseudot*), 7.46 (1H, dd), 7.42 (2H, *pseudot*), 7.35 (1H, dd), 7.04 (1H, t), 6.99 (1H, d), 3.72 (3H, s).

$^{13}\text{C NMR}$  ( $\text{CDCl}_3$ ):  $\delta$  196.4, 157.3, 137.8, 133.0, 131.8, 129.8, 129.6, 128.9, 128.2, 120.5, 111.4, 55.6.

#### 1-(2-Methoxyphenyl)-1-phenyl-2-propyn-1-ol

2.00 g (9.4 mmol) of 2-methoxybenzophenone was dissolved in dry THF (50 ml) and 50 ml of 0.5 M ethynylmagnesium bromide (25 mmol) solution in THF was added dropwise. The mixture obtained was stirred over 24 h at room temperature, then 100 ml of 5% aqueous  $\text{NH}_4\text{Cl}$  solution was added. The product was extracted with diethyl ether (2 x 100 ml), the organic layer was dried over  $\text{Na}_2\text{SO}_4$ , and the solvent was evaporated in a vacuum. The obtained oil was purified by flash chromatography on  $\text{SiO}_2$ , using  $\text{CHCl}_3$  as eluent; yield: 1.65 g (74%) of a yellow oil.

$^1\text{H NMR}$  ( $\text{CDCl}_3$ ):  $\delta$  7.54 (2H, *pseudod*), 7.40 (1H, dd), 7.34 (2H, *pseudot*), 7.31 (1H, ddd), 7.29 (1H; *pseudot*), 6.96 (1H, td); 6.93 (1H, dd), 4.90 (1H, s), 3.76 (3H, s), 2.82 (1H, s).

$^{13}\text{C NMR}$  ( $\text{CDCl}_3$ ):  $\delta$  156.8, 144.0, 132.1, 129.6, 128.4, 128.0, 127.6, 126.2, 120.9, 112.2, 85.6, 75.1, 74.2, 55.8.

#### 3-(2-Methoxyphenyl)-3-phenyl-3H-benzo[f]chromene

A solution of 1.00 g of 1-(2-methoxyphenyl)-1-phenyl-2-propyn-1-ol (4.2 mmol), 0.61 g of 2-naphthol (4.2 mmol), 1.5 mL of triethyl orthoformate (9 mmol), and 50 mg of pyridine tosylate (catalyst) in 30 mL of dry 1,2-dichloroethane was heated over 5 h under reflux in an inert atmosphere and protected from light. After cooling, the solvent was evaporated in a vacuum, the residue was dissolved in 25 mL of dichloromethane, and this solution was washed with

water (2 x 20 mL). The organic layer was dried over Na<sub>2</sub>SO<sub>4</sub>, evaporated, and the product obtained was purified by column chromatography on SiO<sub>2</sub> using chloroform/hexane 1:1 (v/v) as eluent; yield 1.37 g (89%) as off-white fluffy crystals (m.p. 152-153°C).

<sup>1</sup>H NMR (CDCl<sub>3</sub>): δ 7.96 (1H, d, 8.3 Hz; H7), 7.76 (1H, dd, 7.7 & 1.7 Hz; H6'), 7.71 (1H, d, 8.1 Hz; H10), 7.65 (1H, d, 8.8 Hz; H6); 7.46 (1H, overlapped; H8), 7.45 (2H, *pseudod*; H2''), 7.31 (1H, ddd, 8.1, 6.8 & 1.0 Hz; H9), 7.28 (3H, m; H4', H3''), 7.25 (1H, d, 10.2 Hz; H1), 7.22 (1H, *pseudot*; H4''), 7.19 (1H, d, 8.8 Hz; H5), 6.97 (1H, dd, 7.7 & 1.1 Hz; H5'), 6.88 (1H, dd, 8.1 & 0.9 Hz; H3'), 6.56 (1H, d, 10.2 Hz; H2), 3.56 (3H, s; H7')

<sup>13</sup>C NMR (CDCl<sub>3</sub>): δ 155.7 (C2'), 150.3 (C13), 144.4 (C1'), 132.4 (C1'); 129.8 (C11), 129.4 (C6), 129.3 (C12), 128.9 (C4'), 128.5 (C10), 127.8 (C3''), 127.4 (C6'), 127.3 (C4''), 127.1 (C2''), 126.8 (C2), 126.4 (H8), 123.4 (C9), 121.3 (C7), 120.5 (C5'), 118.6 (C1), 118.3 (C5), 113.8 (C14), 112.4 (C3'), 82.1 (C3), 55.5 (C7')

2-Methoxybenzophenone in CDCl<sub>3</sub>

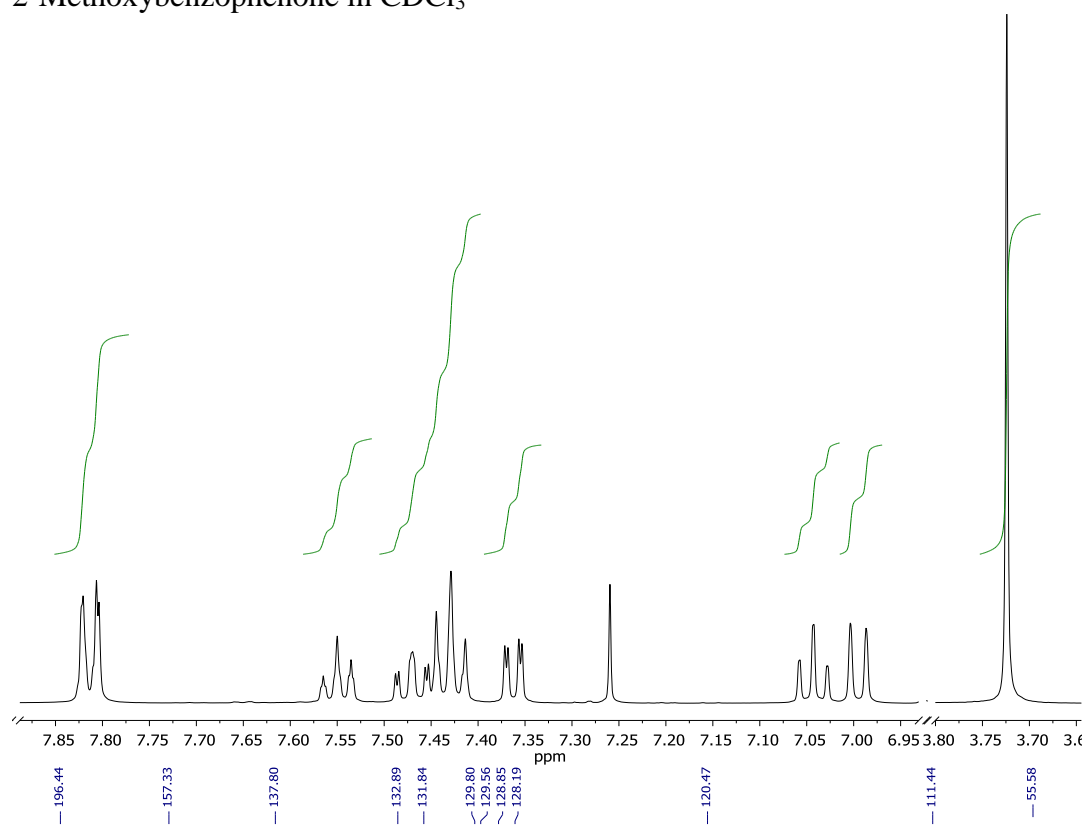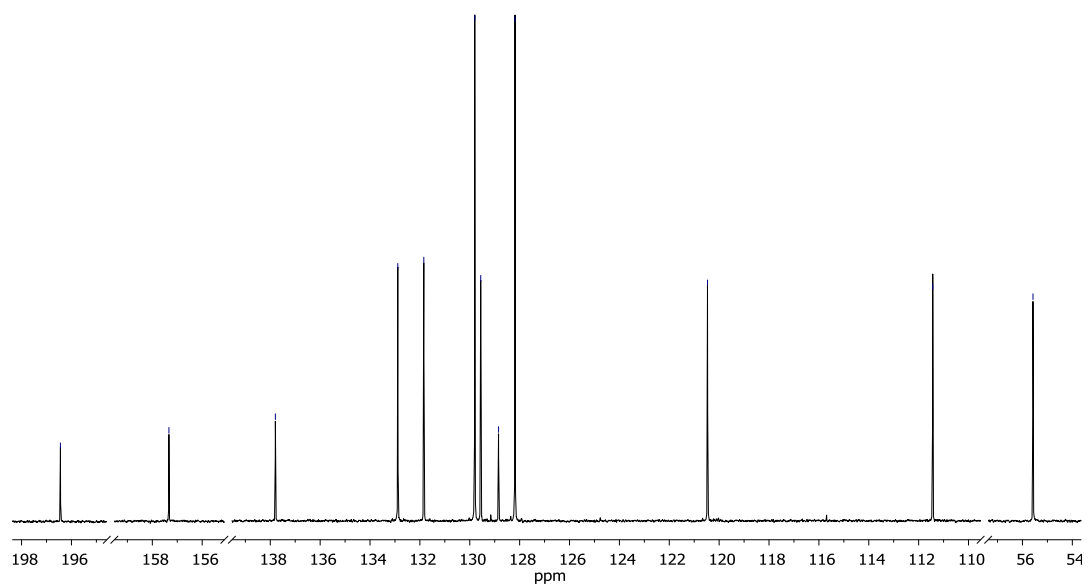

1-(2-Methoxyphenyl)-1-phenyl-2-propyn-1-ol in CDCl<sub>3</sub>

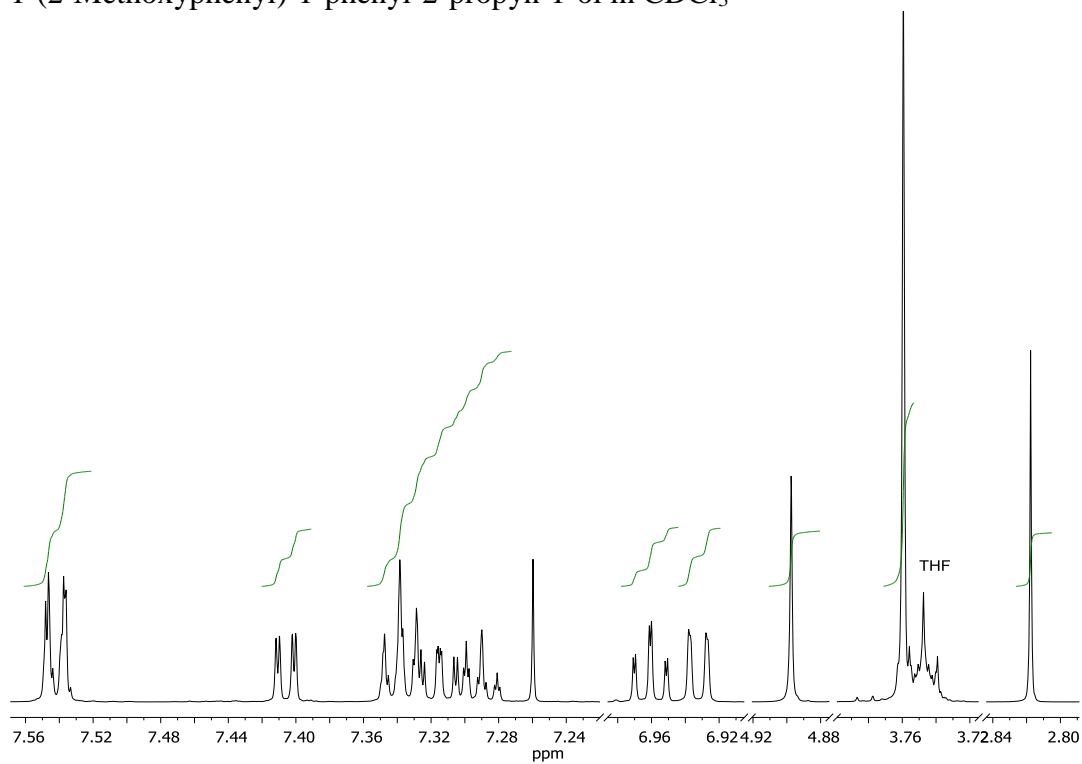

156.75  
144.02  
132.05  
129.56  
128.40  
127.99  
127.60  
126.17  
120.91  
112.17  
85.61  
75.06  
74.28  
55.79

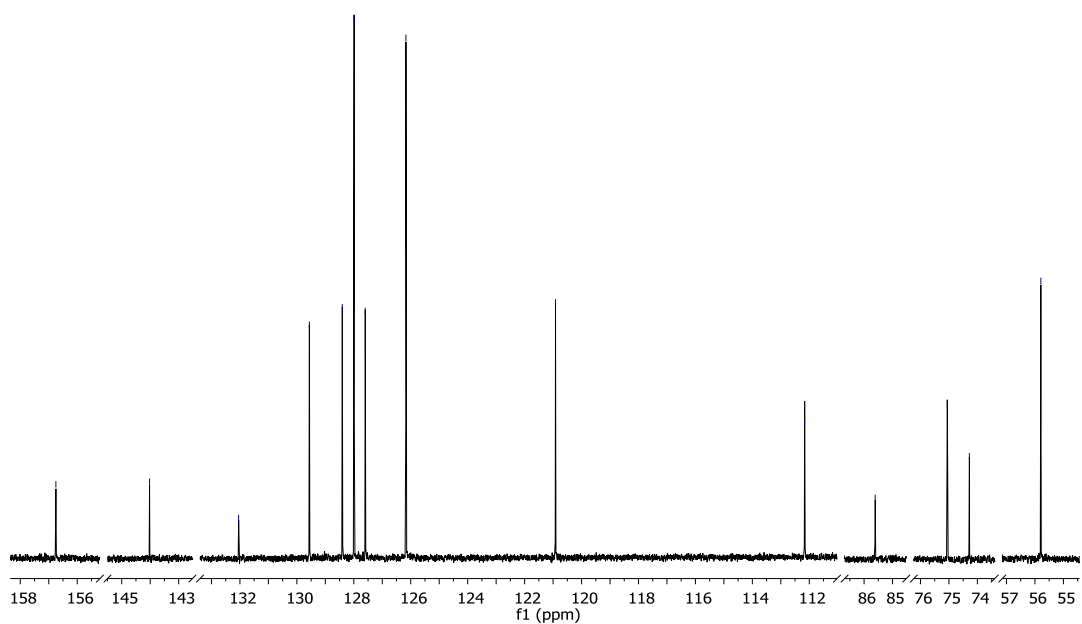

3-(2-Methoxyphenyl)-3-phenyl-3H-benzof[*f*]chromene in CDCl<sub>3</sub>

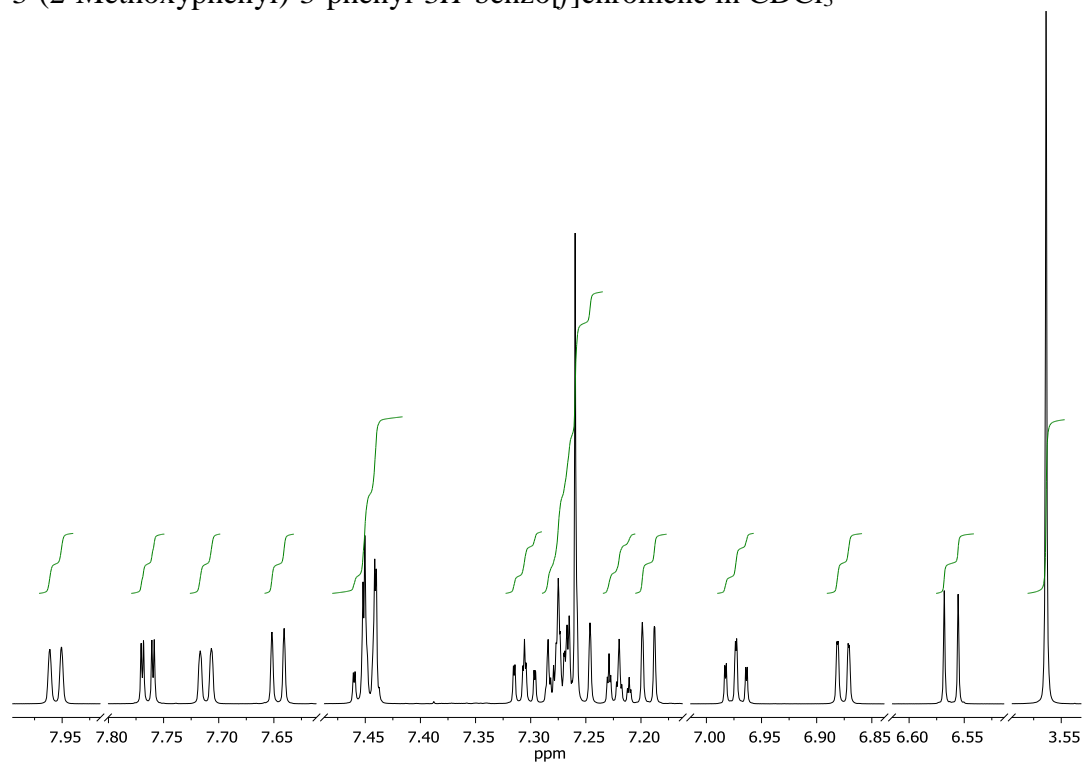

— 155.73  
— 150.34  
— 144.35  
— 132.36  
/ 129.78  
/ 129.44  
/ 129.32  
/ 128.93  
/ 128.46  
/ 127.75  
/ 127.38  
/ 127.33  
/ 127.06  
/ 126.76  
/ 126.43  
— 123.43  
— 121.33  
— 120.53  
/ 118.59  
/ 118.26  
— 113.81  
— 112.41  
— 82.10  
— 55.47

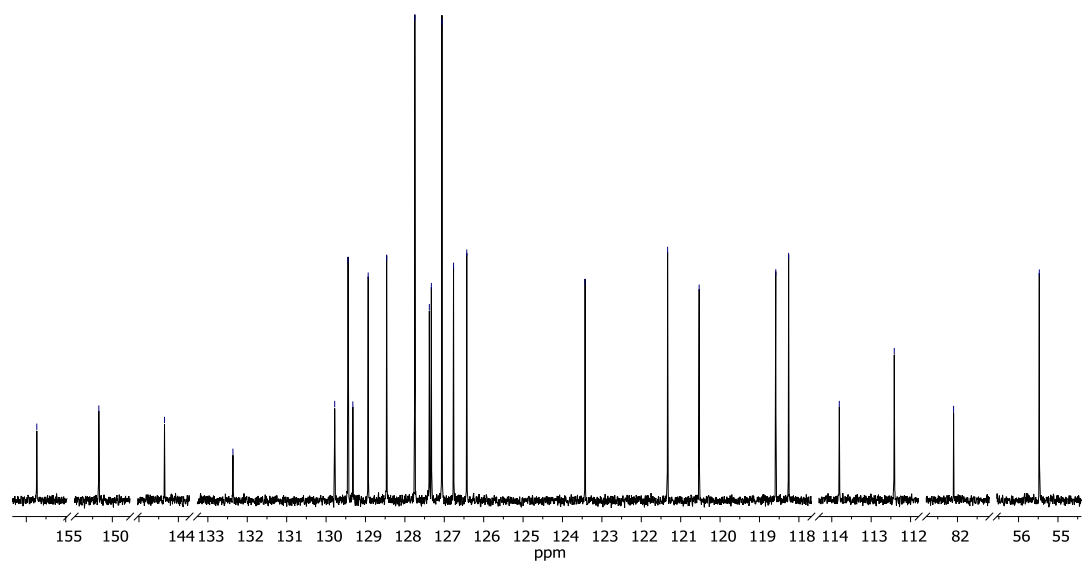

**Figure S1.** UV-vis molar extinction spectrum of **2** in cyclohexane.

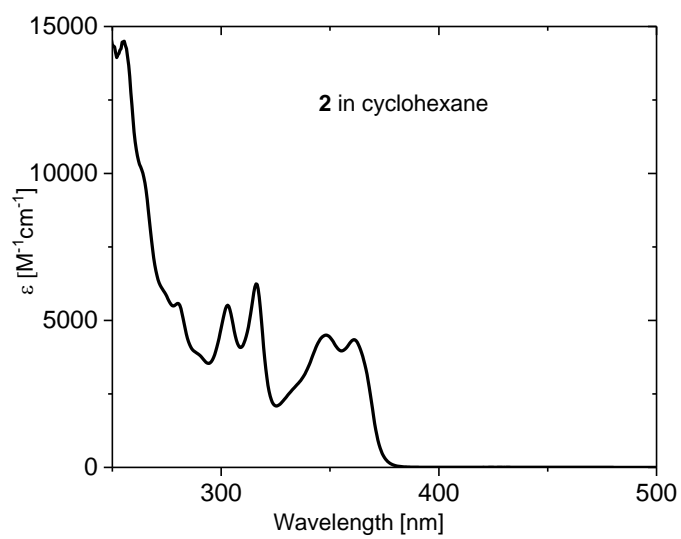

**Figure S2.** Colored species are generated upon UV irradiation at 365 nm (period 1 min, 4.1 mW/cm<sup>2</sup>) of **2** in cyclohexane ( $A(365) = 0.39$ ) at 21 °C (A) Transient absorption UV-vis spectra determined at delays related to the moment of UV irradiation cessation (B) Kinetics trace probed at 421 nm can be fitted with a biexponential function, the short time-constant  $\tau_1=17.5$  min corresponds to **TC2** population, while the long component ( $\tau_2= 16$  h) describes the **TT** population decay.

(A)

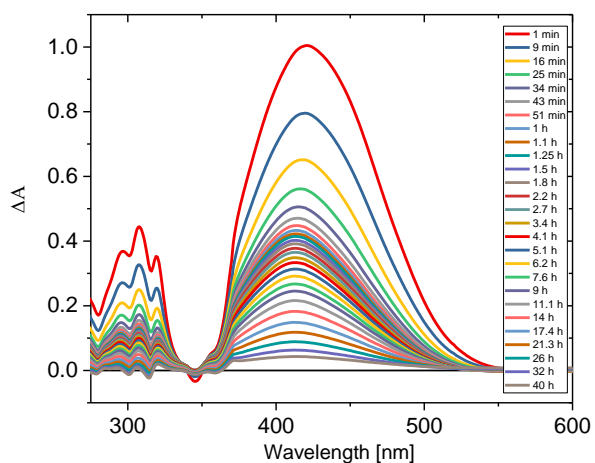

(B)

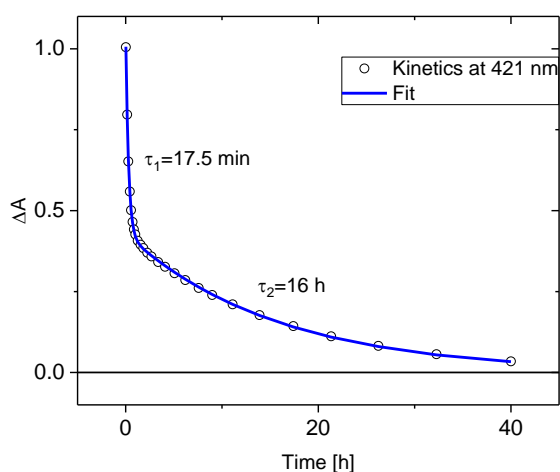



**Table S1.** Vertical excitation energy,  $\Delta E^{VE}$  (in eV) and  $\lambda_{abs}$  (in nm), oscillator strength,  $f$ , and dipole moment,  $\mu_e$  (in Debye), of the lowest excited singlet states calculated with the CC2/aug-cc-pVDZ method for the ground state equilibrium forms optimized at the MP2/cc-pVDZ theory level. Dipole moment of the ground-state,  $\mu_g$  (in Debye, MP2/cc-pVDZ).

| $S_0$ form                                                                                                    |                                 | $\Delta E^{VE}$    | $\lambda_{abs}$ | $f$          | $\mu_e$       |
|---------------------------------------------------------------------------------------------------------------|---------------------------------|--------------------|-----------------|--------------|---------------|
| <b>colorless CF forms</b>                                                                                     |                                 |                    |                 |              |               |
| <b>CF<sub>a</sub></b><br>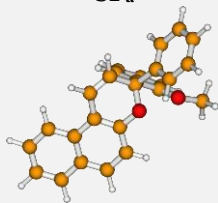    | $S_0$                           | 0.056 <sup>a</sup> |                 |              | $\mu_g = 1.8$ |
|                                                                                                               | $S_0 \rightarrow S_1(\pi\pi^*)$ | <b>3.68</b>        | <b>337</b>      | <b>0.077</b> | 2.5           |
|                                                                                                               | $S_0 \rightarrow S_2(\pi\pi^*)$ | <b>4.24</b>        | <b>293</b>      | <b>0.082</b> | 1.6           |
|                                                                                                               | $S_0 \rightarrow S_3(n\pi^*)$   | 4.55               | 273             | 0.004        | 4.9           |
|                                                                                                               | $S_0 \rightarrow S_4(n\pi^*)$   | <b>4.70</b>        | 264             | <b>0.073</b> | 3.9           |
|                                                                                                               | $S_0 \rightarrow S_5(\pi\pi^*)$ | 4.79               | <b>259</b>      | 0.004        | 8.8           |
|                                                                                                               | $S_0 \rightarrow S_6(\pi\pi^*)$ | <b>4.84</b>        | <b>256</b>      | <b>0.085</b> | 13.0          |
| <b>CF<sub>b</sub></b><br>    | $S_0$                           | 0.064 <sup>a</sup> |                 |              | $\mu_g = 2.6$ |
|                                                                                                               | $S_0 \rightarrow S_1(\pi\pi^*)$ | <b>3.70</b>        | <b>335</b>      | <b>0.075</b> | 4.1           |
|                                                                                                               | $S_0 \rightarrow S_2(\pi\pi^*)$ | <b>4.22</b>        | <b>294</b>      | <b>0.044</b> | 2.5           |
|                                                                                                               | $S_0 \rightarrow S_3(\pi\pi^*)$ | 4.59               | 270             | <b>0.003</b> | 3.7           |
|                                                                                                               | $S_0 \rightarrow S_4(\pi\pi^*)$ | <b>4.73</b>        | <b>262</b>      | <b>0.018</b> | 5.5           |
|                                                                                                               | $S_0 \rightarrow S_5(\pi\pi^*)$ | <b>4.79</b>        | <b>259</b>      | <b>0.041</b> | 3.7           |
|                                                                                                               | $S_0 \rightarrow S_6(n\pi^*)$   | 4.91               | 253             | 0.006        | 6.4           |
| <b>CF<sub>c</sub></b><br>   | $S_0$                           | 0.0                |                 |              | $\mu_g = 2.4$ |
|                                                                                                               | $S_0 \rightarrow S_1(\pi\pi^*)$ | <b>3.71</b>        | <b>335</b>      | <b>0.079</b> | 3.2           |
|                                                                                                               | $S_0 \rightarrow S_2(\pi\pi^*)$ | <b>4.24</b>        | <b>293</b>      | <b>0.078</b> | 2.1           |
|                                                                                                               | $S_0 \rightarrow S_3(n\pi^*)$   | 4.60               | 270             | 0.005        | 4.1           |
|                                                                                                               | $S_0 \rightarrow S_4(\pi\pi^*)$ | <b>4.77</b>        | <b>260</b>      | <b>0.098</b> | 4.5           |
|                                                                                                               | $S_0 \rightarrow S_5(\pi\pi^*)$ | 4.80               | 259             | 0.005        | 7.8           |
|                                                                                                               | $S_0 \rightarrow S_6(\pi\pi^*)$ | <b>4.95</b>        | 251             | <b>0.039</b> | 2.5           |
| <b>CF<sub>d</sub></b><br>  | $S_0$                           | 0.113 <sup>a</sup> |                 |              | $\mu_g = 1.6$ |
|                                                                                                               | $S_0 \rightarrow S_1(\pi\pi^*)$ | <b>3.66</b>        | <b>339</b>      | <b>0.071</b> | 3.0           |
|                                                                                                               | $S_0 \rightarrow S_2(n\pi^*)$   | <b>4.23</b>        | <b>293</b>      | <b>0.047</b> | 1.5           |
|                                                                                                               | $S_0 \rightarrow S_3(n\pi^*)$   | 4.58               | 271             | 0.003        | 4.4           |
|                                                                                                               | $S_0 \rightarrow S_4(\pi\pi^*)$ | <b>4.66</b>        | <b>266</b>      | <b>0.005</b> | 6.8           |
|                                                                                                               | $S_0 \rightarrow S_5(\pi\pi^*)$ | <b>4.76</b>        | <b>261</b>      | <b>0.089</b> | 2.5           |
|                                                                                                               | $S_0 \rightarrow S_6(n\pi^*)$   | 4.84               | 256             | 0.001        | 5.7           |
| <b>colored TC forms</b>                                                                                       |                                 |                    |                 |              |               |
| <b>CTC<sub>a</sub></b><br> | $S_0$                           | 0.626 <sup>a</sup> |                 |              | $\mu_g = 3.5$ |
|                                                                                                               | $S_0 \rightarrow S_1(\pi\pi^*)$ | <b>2.72</b>        | <b>456</b>      | <b>0.034</b> | 2.1           |
|                                                                                                               | $S_0 \rightarrow S_2(\pi\pi^*)$ | <b>2.94</b>        | <b>422</b>      | <b>0.659</b> | 6.3           |
|                                                                                                               | $S_0 \rightarrow S_3(\pi\pi^*)$ | <b>3.53</b>        | <b>352</b>      | <b>0.041</b> | 8.5           |
|                                                                                                               | $S_0 \rightarrow S_4(\pi\pi^*)$ | <b>3.74</b>        | <b>332</b>      | <b>0.061</b> | 12.3          |
|                                                                                                               | $S_0 \rightarrow S_5(\pi\pi^*)$ | <b>4.15</b>        | <b>299</b>      | <b>0.200</b> | 6.6           |
|                                                                                                               | $S_0 \rightarrow S_6(\pi\pi^*)$ | <b>4.34</b>        | <b>286</b>      | <b>0.045</b> | 3.9           |
| <b>CTC<sub>b</sub></b><br> | $S_0$                           | 0.610 <sup>a</sup> |                 |              | $\mu_g = 4.1$ |
|                                                                                                               | $S_0 \rightarrow S_1(\pi\pi^*)$ | <b>2.72</b>        | <b>456</b>      | <b>0.037</b> | 1.4           |
|                                                                                                               | $S_0 \rightarrow S_2(\pi\pi^*)$ | <b>2.97</b>        | <b>418</b>      | <b>0.718</b> | 7.3           |
|                                                                                                               | $S_0 \rightarrow S_3(\pi\pi^*)$ | <b>3.53</b>        | <b>352</b>      | <b>0.082</b> | 8.3           |
|                                                                                                               | $S_0 \rightarrow S_4(\pi\pi^*)$ | <b>3.82</b>        | <b>325</b>      | <b>0.033</b> | 16.9          |
|                                                                                                               | $S_0 \rightarrow S_5(\pi\pi^*)$ | <b>4.16</b>        | <b>298</b>      | <b>0.212</b> | 7.3           |
|                                                                                                               | $S_0 \rightarrow S_6(n\pi^*)$   | 4.34               | 286             | 0.003        | 11.4          |

|                                                                                                                   |                                 |                    |            |              |               |
|-------------------------------------------------------------------------------------------------------------------|---------------------------------|--------------------|------------|--------------|---------------|
| 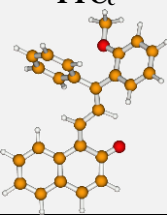 <p><b>TTC<sub>c</sub></b></p>   | $S_0$                           | 0.655 <sup>a</sup> |            |              | $\mu_g = 3.1$ |
|                                                                                                                   | $S_0 \rightarrow S_1(\pi\pi^*)$ | <b>2.74</b>        | <b>453</b> | <b>0.028</b> | 0.9           |
|                                                                                                                   | $S_0 \rightarrow S_2(\pi\pi^*)$ | <b>2.98</b>        | <b>416</b> | <b>0.712</b> | 7.6           |
|                                                                                                                   | $S_0 \rightarrow S_3(\pi\pi^*)$ | <b>3.55</b>        | <b>350</b> | <b>0.082</b> | 6.3           |
|                                                                                                                   | $S_0 \rightarrow S_4(\pi\pi^*)$ | <b>3.79</b>        | <b>327</b> | <b>0.025</b> | 14.9          |
|                                                                                                                   | $S_0 \rightarrow S_5(\pi\pi^*)$ | <b>4.16</b>        | <b>298</b> | <b>0.069</b> | 8.5           |
| <b>colored TT forms</b>                                                                                           |                                 |                    |            |              |               |
|  <p><b>TTC<sub>d</sub></b></p>   | $S_0$                           | 0.670 <sup>a</sup> |            |              | $\mu_g = 2.2$ |
|                                                                                                                   | $S_0 \rightarrow S_1(\pi\pi^*)$ | <b>2.70</b>        | <b>460</b> | <b>0.095</b> | 1.8           |
|                                                                                                                   | $S_0 \rightarrow S_2(\pi\pi^*)$ | <b>2.88</b>        | <b>431</b> | <b>0.639</b> | 6.0           |
|                                                                                                                   | $S_0 \rightarrow S_3(\pi\pi^*)$ | <b>3.53</b>        | <b>352</b> | <b>0.074</b> | 7.0           |
|                                                                                                                   | $S_0 \rightarrow S_4(\pi\pi^*)$ | <b>3.80</b>        | <b>327</b> | <b>0.058</b> | 10.7          |
|                                                                                                                   | $S_0 \rightarrow S_5(\pi\pi^*)$ | <b>4.15</b>        | <b>299</b> | <b>0.111</b> | 6.3           |
|  <p><b>CTT<sub>a</sub></b></p>   | $S_0$                           | 0.595 <sup>a</sup> |            |              | $\mu_g = 2.1$ |
|                                                                                                                   | $S_0 \rightarrow S_1(\pi\pi^*)$ | <b>2.87</b>        | <b>432</b> | <b>0.156</b> | 1.1           |
|                                                                                                                   | $S_0 \rightarrow S_2(\pi\pi^*)$ | <b>3.04</b>        | <b>408</b> | <b>0.392</b> | 6.0           |
|                                                                                                                   | $S_0 \rightarrow S_3(\pi\pi^*)$ | <b>3.60</b>        | <b>345</b> | <b>0.069</b> | 2.8           |
|                                                                                                                   | $S_0 \rightarrow S_4(\pi\pi^*)$ | <b>4.72</b>        | <b>263</b> | <b>0.052</b> | 2.8           |
|                                                                                                                   | $S_0 \rightarrow S_5(\pi\pi^*)$ | <b>4.21</b>        | <b>295</b> | <b>0.096</b> | 5.3           |
|  <p><b>CTT<sub>b</sub></b></p> | $S_0$                           | 0.650 <sup>a</sup> |            |              | $\mu_g = 3.0$ |
|                                                                                                                   | $S_0 \rightarrow S_1(\pi\pi^*)$ | <b>2.81</b>        | <b>442</b> | <b>0.118</b> | 1.2           |
|                                                                                                                   | $S_0 \rightarrow S_2(\pi\pi^*)$ | <b>3.09</b>        | <b>402</b> | <b>0.589</b> | 7.3           |
|                                                                                                                   | $S_0 \rightarrow S_3(\pi\pi^*)$ | <b>3.64</b>        | <b>341</b> | <b>0.054</b> | 5.4           |
|                                                                                                                   | $S_0 \rightarrow S_4(\pi\pi^*)$ | <b>3.83</b>        | <b>324</b> | <b>0.024</b> | 14.4          |
|                                                                                                                   | $S_0 \rightarrow S_5(\pi\pi^*)$ | <b>4.22</b>        | <b>294</b> | <b>0.133</b> | 8.0           |
|  <p><b>TTT<sub>c</sub></b></p> | $S_0$                           | 0.676 <sup>a</sup> |            |              | $\mu_g = 4.1$ |
|                                                                                                                   | $S_0 \rightarrow S_1(\pi\pi^*)$ | <b>2.83</b>        | <b>439</b> | <b>0.109</b> | 1.4           |
|                                                                                                                   | $S_0 \rightarrow S_2(\pi\pi^*)$ | <b>3.10</b>        | <b>400</b> | <b>0.585</b> | 8.2           |
|                                                                                                                   | $S_0 \rightarrow S_3(\pi\pi^*)$ | <b>3.65</b>        | <b>340</b> | <b>0.046</b> | 7.2           |
|                                                                                                                   | $S_0 \rightarrow S_4(\pi\pi^*)$ | <b>3.92</b>        | <b>324</b> | <b>0.042</b> | 16.9          |
|                                                                                                                   | $S_0 \rightarrow S_5(\pi\pi^*)$ | <b>4.23</b>        | <b>293</b> | <b>0.133</b> | 8.1           |
|  <p><b>TTT<sub>d</sub></b></p> | $S_0$                           | 0.694 <sup>a</sup> |            |              | $\mu_g = 4.4$ |
|                                                                                                                   | $S_0 \rightarrow S_1(\pi\pi^*)$ | <b>2.80</b>        | <b>443</b> | <b>0.185</b> | 2.5           |
|                                                                                                                   | $S_0 \rightarrow S_2(\pi\pi^*)$ | <b>3.01</b>        | <b>412</b> | <b>0.500</b> | 6.9           |
|                                                                                                                   | $S_0 \rightarrow S_3(\pi\pi^*)$ | <b>3.64</b>        | <b>341</b> | <b>0.032</b> | 8.4           |
|                                                                                                                   | $S_0 \rightarrow S_4(\pi\pi^*)$ | <b>3.93</b>        | <b>316</b> | <b>0.053</b> | 13.5          |
|                                                                                                                   | $S_0 \rightarrow S_5(\pi\pi^*)$ | <b>4.21</b>        | <b>295</b> | <b>0.160</b> | 7.9           |
|                                                                                                                   | $S_0 \rightarrow S_6(\pi\pi^*)$ | <b>4.32</b>        | <b>287</b> | <b>0.110</b> | 5.8           |

**Table S2.** Comparison of geometric parameters (bond lengths, in Å, dihedral angles), adiabatic energies ( $E^a$ , in eV) of the excited state ( $S_1$ ) and ground state ( $S_0$ ) geometries of the species involved in photoreaction of **2** optimized respectively at the ADC(2)/cc-pVDZ and MP2/cc-pVDZ levels of theory, respectively. Here  $\sigma$  and  $\tau$  denote  $C_{14}=C_1-C_2=C_3$  and  $C_5-C_{13}-C_{14}=C_1$  dihedral angles, respectively.

| $S_0$ - or $S_1$ -<br>State<br>Form  | $R_1$<br>$C_3-O_4$<br>[Å] | $\theta_1$<br>$C_{13}-C_{14}=C_1-C_2$<br>[°] | $\theta_2$<br>$C_1-C_2=C_3-C_{1'}$<br>[°] | $\sigma$<br>[°] | $\tau$<br>[°] | $R_2$<br>$C_{13}-O_4$<br>[Å] | $R_D$<br>$C_1-C_{14}$<br>[Å] | $R_S$<br>$C_1-C_2$<br>[Å] | $R_E$<br>$C_2-C_3$<br>[Å] | $E^a$<br>[eV] |
|--------------------------------------|---------------------------|----------------------------------------------|-------------------------------------------|-----------------|---------------|------------------------------|------------------------------|---------------------------|---------------------------|---------------|
| $S_0^{CFa}$                          | 1.454                     | 19.7                                         | 81.7                                      | 3.0             | 172.0         | 1.368                        | 1.460                        | 1.360                     | 1.516                     | 0.056         |
| $S_0^{INTa}$                         | 2.835                     | 17.6                                         | 6.0                                       | 43.0            | 154.8         | 1.240                        | 1.389                        | 1.446                     | 1.380                     | 0.844         |
| $S_0^{CTCa}$                         | 4.196                     | 5.6                                          | -4.3                                      | 172.9           | 159.4         | 1.239                        | 1.384                        | 1.435                     | 1.382                     | 0.626         |
| $S_1^{CTCa}$                         | 3.953                     | 22.8                                         | -12.7                                     | -177.2          | 174.1         | 1.401                        | 1.475                        | 1.370                     | 1.434                     | 2.210         |
| $S_1^{TWA}$                          | 4.647                     | 92.0                                         | -7.0                                      | 175.5           | 178.3         | 1.261                        | 1.474                        | 1.366                     | 1.437                     | 1.944         |
| $S_1^{BPa}$                          | 4.298                     | 61.0                                         | -63.9                                     | 179.9           | 176.3         | 1.264                        | 1.477                        | 1.346                     | 1.491                     | 1.965         |
| $S_0^{CFb}$                          | 1.458                     | 17.9                                         | 84.6                                      | 4.3             | 170.6         | 1.373                        | 1.460                        | 1.358                     | 1.520                     | 0.064         |
| $S_0^{INTb}$                         | 2.855                     | 22.2                                         | 3.0                                       | 48.8            | 151.1         | 1.237                        | 1.384                        | 1.447                     | 1.375                     | 0.858         |
| $S_0^{CTCb}$                         | 4.175                     | 3.0                                          | -9.6                                      | 176.0           | 159.2         | 1.239                        | 1.386                        | 1.437                     | 1.382                     | 0.610         |
| $S_1^{CTCb}$                         | 3.914                     | 20.1                                         | -15.9                                     | -174.8          | 174.1         | 1.401                        | 1.475                        | 1.376                     | 1.431                     | 2.187         |
| $S_0^{TWb}$                          | 4.521                     | 87.4                                         | -11.7                                     | -179.9          | 178.7         | 1.261                        | 1.474                        | 1.371                     | 1.436                     | 2.004         |
| $S_1^{BPb}$                          | 4.311                     | 66.9                                         | -61.8                                     | -176.4          | 175.7         | 1.265                        | 1.482                        | 1.343                     | 1.488                     | 2.106         |
| $S_0^{CFc}$                          | 1.458                     | 19.6                                         | 80.4                                      | 3.1             | 172.2         | 1.371                        | 1.461                        | 1.359                     | 1.514                     | 0.000         |
| $S_1^{INTc}$                         | 2.769                     | 17.7                                         | 8.2                                       | 47.3            | 150.9         | 1.239                        | 1.387                        | 1.449                     | 1.376                     | 0.906         |
| $S_0^{TTCc}$                         | 4.163                     | -1.7                                         | 8.5                                       | -173.4          | -159.6        | 1.239                        | 1.385                        | 1.439                     | 1.383                     | 0.655         |
| $S_1^{TTCc}$                         | 3.910                     | -22.9                                        | 16.9                                      | 174.0           | -174.1        | 1.398                        | 1.478                        | 1.372                     | 1.439                     | 2.237         |
| $S_1^{TWC}$                          | 4.350                     | -80.5                                        | 18.4                                      | 174.4           | -176.1        | 1.263                        | 1.476                        | 1.365                     | 1.446                     | 2.023         |
| $S_1^{BPc}$ collapses to $S_1^{TWC}$ |                           |                                              |                                           |                 |               |                              |                              |                           |                           |               |
| $S_0^{CFd}$                          | 1.459                     | 18.8                                         | 77.9                                      | 6.2             | 170.2         | 1.370                        | 1.461                        | 1.358                     | 1.517                     | 0.113         |
| $S_1^{INTd}$                         | 2.774                     | 17.0                                         | 8.6                                       | 46.0            | 151.7         | 1.239                        | 1.389                        | 1.444                     | 1.380                     | 0.938         |
| $S_0^{TTCd}$                         | 4.171                     | 2.2                                          | -8.6                                      | 173.7           | 160.0         | 1.240                        | 1.387                        | 1.436                     | 1.385                     | 0.670         |
| $S_1^{TTCd}$                         | 3.995                     | 25.7                                         | -16.9                                     | -177.2          | 175.7         | 1.402                        | 1.482                        | 1.369                     | 1.443                     | 2.166         |
| $S_1^{TWD}$                          | 4.496                     | 87.7                                         | -17.8                                     | -176.6          | 178.4         | 1.264                        | 1.477                        | 1.363                     | 1.452                     | 1.929         |
| $S_1^{BPD}$                          | 4.345                     | 57.9                                         | -67.4                                     | 176.1           | 176.0         | 1.267                        | 1.486                        | 1.342                     | 1.500                     | 2.100         |

**Table S3.** Comparison of geometric parameters (bond lengths, in Å, dihedral angles), adiabatic energies ( $E_a$ , in eV) of the excited state ( $S_1$ ) and ground state ( $S_0$ ) geometries of the species involved in photoreaction of methyl derivative (3-(2-methylphenyl)-3-phenyl-3H-benzo[f]chromene) optimized respectively at the ADC(2)/cc-pVDZ and MP2/cc-pVDZ levels of theory, respectively. Here  $\sigma$  and  $\tau$  denote  $C_{14}=C_1-C_2=C_3$  and  $C_5-C_{13}-C_{14}=C_1$  dihedral angles, respectively.

| $S_0$ - or $S_1$ -<br>State<br>Form                                                 | $R_1$<br>$C_3-O_4$<br>[Å] | $\theta_1$<br>$C_{13}-C_{14}=C_1-C_2$<br>[°] | $\theta_2$<br>$C_1-C_2=C_3-C_{1'}$<br>[°] | $\sigma$<br>[°] | $\tau$<br>[°] | $R_2$<br>$C_{13}-O_4$<br>[Å] | $R_D$<br>$C_1-C_{14}$<br>[Å] | $R_S$<br>$C_1-C_2$<br>[Å] | $R_E$<br>$C_2-C_3$<br>[Å] | $E_a$<br>[eV] |
|-------------------------------------------------------------------------------------|---------------------------|----------------------------------------------|-------------------------------------------|-----------------|---------------|------------------------------|------------------------------|---------------------------|---------------------------|---------------|
| <b>CFa</b>                                                                          |                           |                                              |                                           |                 |               |                              |                              |                           |                           |               |
| 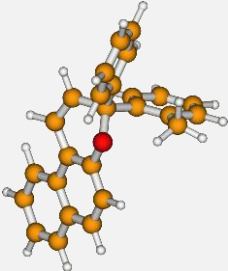   |                           |                                              |                                           |                 |               |                              |                              |                           |                           |               |
| $S_0^{CFa}$                                                                         | 1.459                     | 20.0                                         | 82.4                                      | 2.4             | 172.1         | 1.372                        | 1.460                        | 1.360                     | 1.517                     | 0.00          |
| $S_0^{INTa}$                                                                        | 2.832                     | 18.1                                         | 5.6                                       | 44.5            | 153.8         | 1.239                        | 1.387                        | 1.447                     | 1.380                     | 0.779         |
| $S_0^{CTCa}$                                                                        | 4.180                     | 4.2                                          | -5.9                                      | 172.6           | 160.3         | 1.239                        | 1.385                        | 1.437                     | 1.382                     | 0.554         |
| $S_1^{CTCa}$                                                                        | 3.949                     | 19.8                                         | -13.6                                     | -177.4          | -175.2        | 1.402                        | 1.475                        | 1.373                     | 1.432                     | 2.130         |
| $S_1^{TWA}$                                                                         | 4.497                     | 88.9                                         | -2.9                                      | -177.5          | 178.5         | 1.261                        | 1.474                        | 1.370                     | 1.435                     | 1.954         |
| $S_1^{BPa}$                                                                         | 4.274                     | 61.1                                         | -59.2                                     | -177.9          | 176.5         | 1.265                        | 1.482                        | 1.343                     | 1.492                     | 1.971         |
| <b>CFb</b>                                                                          |                           |                                              |                                           |                 |               |                              |                              |                           |                           |               |
|  |                           |                                              |                                           |                 |               |                              |                              |                           |                           |               |
| $S_0^{CFb}$                                                                         | 1.461                     | 19.0                                         | 81.8                                      | 5.4             | 169.1         | 1.372                        | 1.459                        | 1.359                     | 1.519                     | 0.095         |
| $S_0^{INTb}$                                                                        | 2.843                     | 20.2                                         | 4.0                                       | 44.0            | 158.0         | 2.843                        | 1.387                        | 1.446                     | 1.379                     | 0.857         |
| $S_0^{CTCb}$                                                                        | 4.185                     | 3.8                                          | -7.8                                      | 175.9           | 159.1         | 1.239                        | 1.385                        | 1.438                     | 1.383                     | 0.538         |
| $S_1^{CTCb}$                                                                        | 3.928                     | 19.9                                         | -13.9                                     | -175.9          | 174.2         | 1.403                        | 1.475                        | 1.376                     | 1.430                     | 2.118         |
| $S_0^{TWb}$                                                                         | 4.527                     | 88.1                                         | -9.4                                      | 179.9           | 179.1         | 1.261                        | 1.474                        | 1.371                     | 1.436                     | 1.907         |
| $S_1^{BPb}$                                                                         | --                        | --                                           | --                                        | --              | --            | --                           | --                           | --                        | --                        | -----         |
| <b>CFc</b>                                                                          |                           |                                              |                                           |                 |               |                              |                              |                           |                           |               |
|  |                           |                                              |                                           |                 |               |                              |                              |                           |                           |               |
| $S_0^{CFc}$                                                                         | 1.462                     | 20.6                                         | 78.1                                      | 3.3             | 171.3         | 1.370                        | 1.460                        | 1.360                     | 1.515                     | 0.031         |
| $S_0^{INTc}$                                                                        | 2.766                     | 17.5                                         | 9.5                                       | 45.8            | 151.1         | 1.241                        | 1.389                        | 1.445                     | 1.378                     | 0.835         |
| $S_0^{ITCc}$                                                                        | 4.157                     | 1.2                                          | -8.3                                      | 173.5           | 158.3         | 1.239                        | 1.385                        | 1.440                     | 1.383                     | 0.605         |
| $S_1^{ITCc}$                                                                        | 3.906                     | 23.4                                         | -15.9                                     | -173.3          | 173.8         | 1.400                        | 1.480                        | 1.372                     | 1.439                     | 2.178         |
| $S_1^{TWC}$                                                                         | 4.372                     | 82.1                                         | -15.6                                     | -174.6          | 175.9         | 1.262                        | 1.475                        | 1.366                     | 1.445                     | 1.949         |
| $S_1^{BPc}$                                                                         | --                        | --                                           | --                                        | --              | --            | --                           | --                           | --                        | --                        | -----         |

CFd

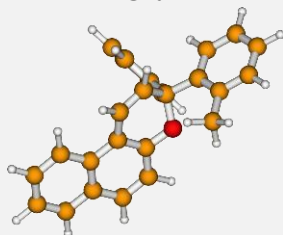

|                                     |       |      |       |        |       |       |       |       |       |       |
|-------------------------------------|-------|------|-------|--------|-------|-------|-------|-------|-------|-------|
| <b>S<sub>0</sub><sup>CFd</sup></b>  | 1.460 | 18.9 | 79.2  | 4.8    | 170.6 | 1.371 | 1.461 | 1.359 | 1.517 | 0.041 |
| <b>S<sub>0</sub><sup>INTd</sup></b> | 2.763 | 17.3 | 8.3   | 47.3   | 150.5 | 1.239 | 1.387 | 1.449 | 1.377 | 0.837 |
| <b>S<sub>0</sub><sup>TTCd</sup></b> | 4.166 | 2.9  | -0.9  | 175.9  | 158.9 | 1.240 | 1.386 | 1.437 | 1.383 | 0.633 |
| <b>S<sub>1</sub><sup>TTCd</sup></b> | 3.973 | 16.9 | -20.1 | -178.4 | 175.5 | 1.400 | 1.477 | 1.373 | 1.437 | 2.172 |
| <b>S<sub>1</sub><sup>TWd</sup></b>  | 4.382 | 83.5 | -17.4 | -173.8 | 177.5 | 1.264 | 1.475 | 1.368 | 1.441 | 1.947 |
| <b>S<sub>1</sub><sup>BPd</sup></b>  | 4.317 | 61.7 | -73.1 | 179.8  | 178.4 | 1.265 | 1.484 | 1.344 | 1.492 | 2.045 |

**CF conversion yield, assignment to TC and TT populations and determination of molar extinction coefficients  $\epsilon_{\max}$  using time-resolved UV-vis and mid-IR absorption spectroscopies.**

As we described in <sup>1</sup>, simultaneous recording of the absorption changes in UV-vis and mid-IR spectral ranges of a photochromic system induced by UV light irradiation is a powerful method for spectroscopic insights into the photoreaction. Representative set of data recorded in the time window 0 – 1600 s is shown below:

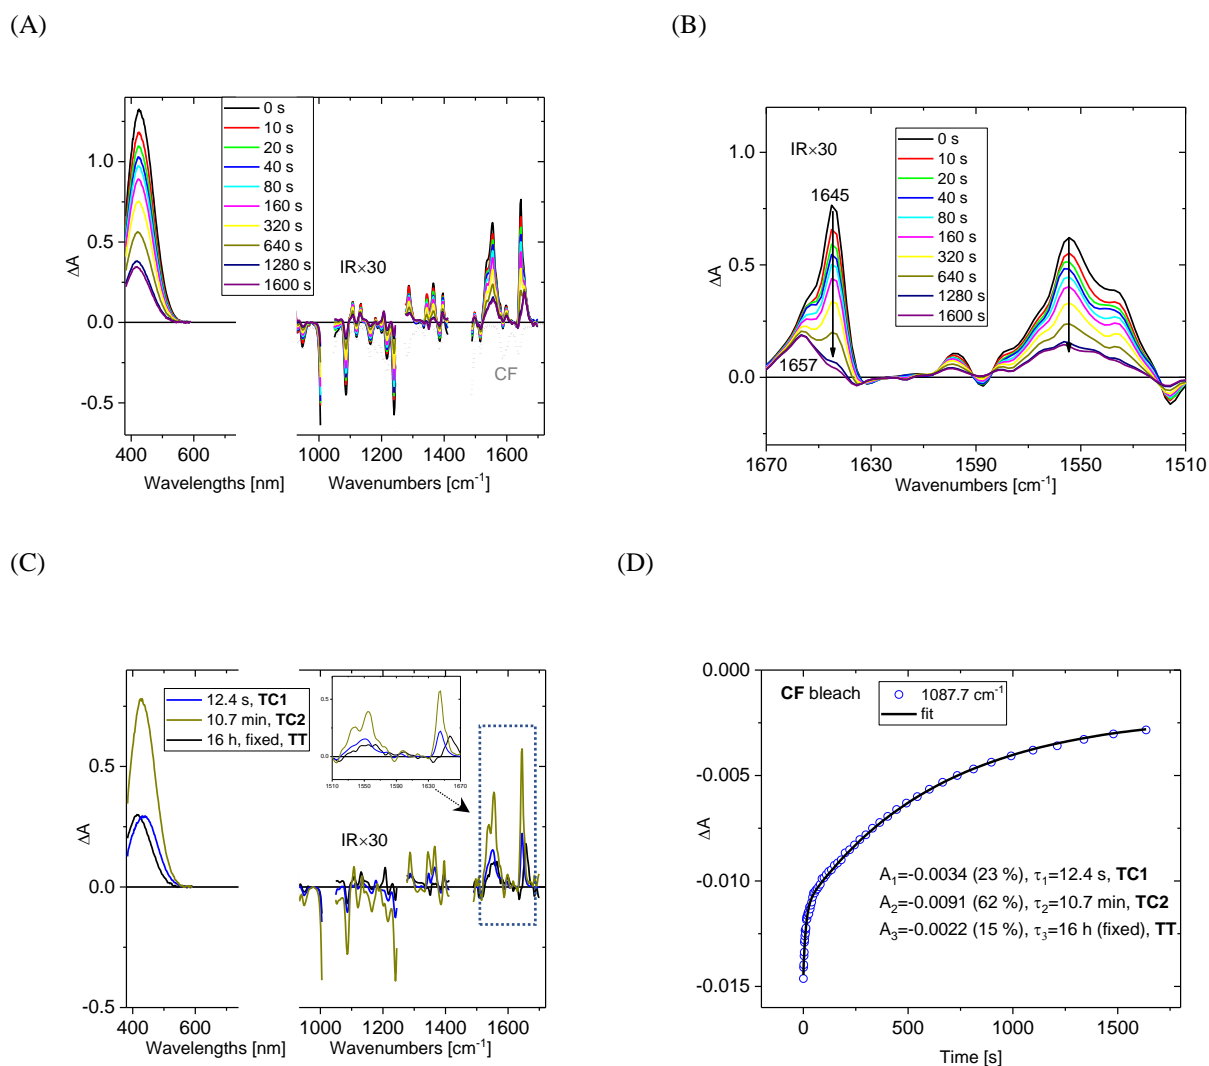

**Figure S3.** (A) Transient absorption UV-vis-IR spectra recorded after 60 s of UV irradiation (LED 365 nm, 2.4 mW) used for a solution of **2** in cyclohexane ( $2.69 \times 10^{-3}$  M) at 26°C. The inverse stationary FTIR absorption spectrum of **CF** is also included. (B) Distinctive peaks of **TC** isomers appear at 1645  $\text{cm}^{-1}$  and **TT** isomer at 1657  $\text{cm}^{-1}$ . (C) Decay associated spectra  $A_1(\lambda)$ ,  $A_2(\lambda)$  and  $A_3(\lambda)$  calculated by global analysis of data using a three exponential function  $\Delta A(\lambda, t) = A_1(\lambda) \exp\left(-\frac{t}{\tau_1}\right) + A_2(\lambda) \exp\left(-\frac{t}{\tau_2}\right) + A_3(\lambda) \exp\left(-\frac{t}{\tau_3}\right)$ . Revealed lifetimes 12.4 s (**TC1**) and 10.7 min (**TC2**), while the third component was set as a fixed value (16 h). The inset shows spectral details in 1510-1670  $\text{cm}^{-1}$ . (D) **CF** bleach recovery kinetics at 1087.7  $\text{cm}^{-1}$  occurs through thermal decay of **TC1**, **TC2** and **TT**. The fit is from global analysis (solid line). The relative path yield is estimated from the amplitude contribution  $A_i/(A_1 + A_2 + A_3)$ .

Figure S4A shows the transient spectra in the spectral ranges 380–580 nm and 1700–930  $\text{cm}^{-1}$ . At time of 0 s, a mixture of **TC1**, **TC2**, **TT** (positive bands) and the bleached **CF** species (negative bands) are observed. The bleached **CF** band at 0s can be compared with the scaled stationary FTIR band of the fresh **CF** solution. The found scaling factor is 0.38, which means that UV irradiation converted 38 % of the initial **CF** population. Figure S4B shows that IR data can clearly distinguish spectrally the C=O vibrational band of the **TC** isomer ( $1645 \text{ cm}^{-1}$ ) and **TT** isomer ( $1657 \text{ cm}^{-1}$ ), in agreement with the reported <sup>1</sup> values for the reference compound **1** (**TC** at  $1644 \text{ cm}^{-1}$  and **TT** at  $1655 \text{ cm}^{-1}$ ). Figure S4C shows the decay associated spectra obtained by global analysis of recorded data, the inset shows clearly the spectral difference between **TC** and **TT** isomers, however, **TC1** and **TC2** show practically identical spectral signature. Thermal decays of **TC1** and **TC2** are characterized by time-constants 12.4 s and 10.7 min, respectively, which are shorter than those in Figure 2 (17.1 s and 17.5 min), due to the difference in temperature ( $26^\circ\text{C}$  vs  $21^\circ\text{C}$ ). Figure S4D presents the **CF** bleaching recovery, which can provide approximate information on relative **TC1**, **TC2** and **TT** contributions: 23 %, 62 % and 15 %. The highest isomer population is **TC2** with estimated concentration of  $[\text{TC2}]_0 = 0.63 \times 10^{-3} \text{ M}$  on the basis of (1) **CF** conversion yield of 0.38 (2) 62 % **TC2** contribution in the **CF** bleached signal. Using the absorbance maximum  $A(\text{TC2})$  in the visible range (see Fig. S4C – left side) one can calculate the respective molar extinction coefficients  $\epsilon_{max}$  according to the formula:

$$\epsilon_{max} = \frac{A(\text{TC2})}{[\text{TC2}]_0 L f} \quad [1]$$

where  $A(\text{TC2})$  is the respective isomer absorbance at time 0 s,  $A(\text{TC2}) = 0.778$  (Figure S4C),  $[\text{TC2}]_0$  is the initial molar isomer concentration,  $[\text{TC2}]_0 = 0.63 \times 10^{-3} \text{ M}$   
 $L$  is the optical length of solution (0.063 cm)  
 $f$  is the angle correction factor (1.05) since UV-vis probe beam passes through a slightly longer solution layer in comparison to that of mid-IR beam. The angle of between IR and UV-vis beams is about  $17^\circ$ .

The obtained molar extinction coefficients for **TC2** is  $\epsilon_{max} \approx 18700 \text{ M}^{-1}\text{cm}^{-1}$ , which is in excellent agreement with the one reported for **TC** isomer ( $18100 \text{ M}^{-1}\text{cm}^{-1}$ ) photogenerated from reference compound **1** <sup>2</sup>.

The method applied for **TC2**, can work also for **TC1** revealing  $\epsilon_{max} \approx 18900 \text{ M}^{-1}\text{cm}^{-1}$ , while for **TT**  $\epsilon_{max} \approx 29500 \text{ M}^{-1}\text{cm}^{-1}$ , however their accuracies are certainly lower due to smaller signal contribution in the UV-vis-IR transient absorption spectra.

**Figure S4.** Thermal decoloration  $\text{TC} \leftrightarrow \text{INT} \rightarrow \text{CF}$  for four starting TC geometries:  $\text{CTC}_a$ ,  $\text{CTC}_b$ ,  $\text{TTC}_c$  and  $\text{TTC}_d$ .

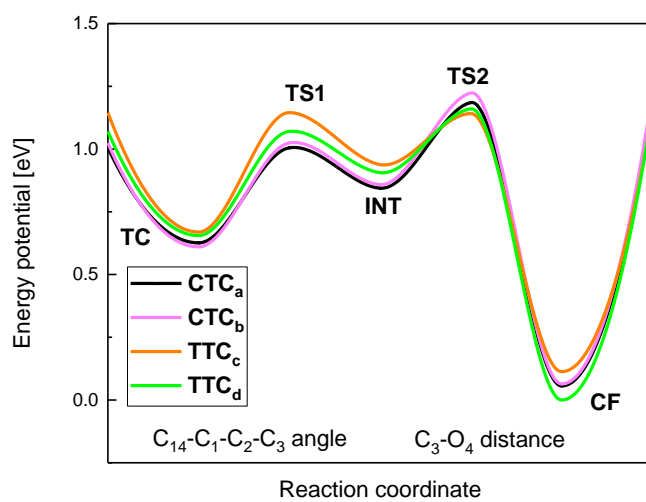



## References:

- 1 Brazevic, S., Nizinski, S., Szabla, R., Rode, M. F. & Burdzinski, G. Photochromic reaction in 3*H*-naphthopyrans studied by vibrational spectroscopy and quantum chemical calculations. *Phys. Chem. Chem. Phys.* **21**, 11861-11870, doi:<https://doi.org/10.1039/C9CP01451A> (2019).
- 2 Zhao, W. & Carreira, E. M. Oligothiophene-linked bisnaphthopyrans: sequential and temperature-dependent photochromism. *Chem. Eur. J.* **13**, 2671-2685 (2007).
